# Supplementary material for: Effect of Different Medium-Chain Triglycerides on Glucose Metabolism in High-Fat-Diet Induced Obese Rats
Source: MDPI journal article supplement (doi:10.3390/foods13020241), 2024-01-11
Supplement: s1 [file s1]

**Effect of different medium chain triglycerides on glucose metabolism in obese  
rats induced by high fat diet**

Jiaheng Xia, Zhixin Wang, Ping Yu\*, Xianghui Yan, Junxin Zhao, Guohua Zhang,

Deming Gong, Zheling Zeng\*

\* Corresponding author: Professor Zheling Zeng, PhD

State Key Laboratory of Food Science and Technology, Nanchang University,

Nanchang 330047, China

Jiangxi Province Key Laboratory of Edible and Medicinal Resources Exploitation,

Nanchang University, Nanchang 330031, China

School of Resource and Environmental and Chemical Engineering, Nanchang

University, Nanchang 330031, China

E-mail: zlzengjx@hotmail.com; zlzengjx@163.com

Tel.: +86-791-88510806      Fax: +86-791-8851080

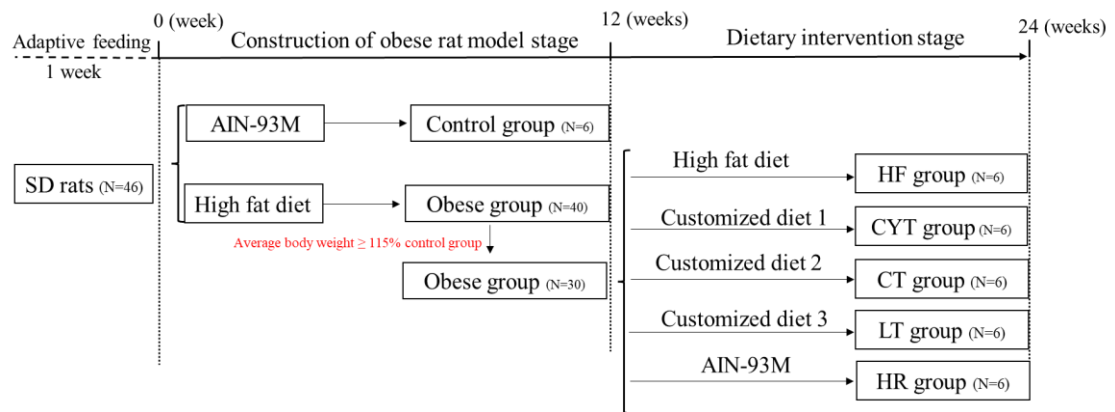

**Figure S1** Description of the animal experiment

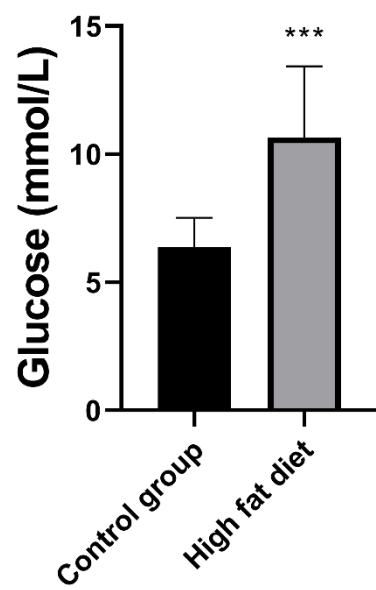

**Figure S2** The concentration glucose in obese rats at the beginning of the dietary intervention phase (12w).

**Table S1.** Composition and Energy Contents of Diets.

| Product                               | High fat diet |         | Custom feed 1 |         | Custom feed 2 |         | Custom feed 3 |         |
|---------------------------------------|---------------|---------|---------------|---------|---------------|---------|---------------|---------|
|                                       | gm%           | Kcal%   | gm%           | Kcal%   | gm%           | Kcal%   | gm%           | Kcal%   |
| Protein                               | 24            | 20      | 24            | 20      | 24            | 20      | 24            | 20      |
| Carbohydrate                          | 41            | 35      | 41            | 35      | 41            | 35      | 41            | 35      |
| Fat                                   | 24            | 45      | 24            | 45      | 24            | 45      | 24            | 45      |
| Ingredients                           | Gm            | Kcal    | Gm            | Kcal    | Gm            | Kcal    | Gm            | Kcal    |
| Casein                                | 233.06        | 932.24  | 233.06        | 932.24  | 233.06        | 932.24  | 233.06        | 932.24  |
| L-Cystine                             | 3.50          | 14      | 3.50          | 14      | 3.50          | 14      | 3.50          | 14      |
| Corn starch                           | 84.83         | 339.32  | 84.83         | 339.32  | 84.83         | 339.32  | 84.83         | 339.32  |
| Maltodextrin                          | 116.53        | 466.12  | 116.53        | 466.12  | 116.53        | 466.12  | 116.53        | 466.12  |
| 10                                    |               |         |               |         |               |         |               |         |
| Sucrose                               | 201.36        | 805.44  | 201.36        | 805.44  | 201.36        | 805.44  | 201.36        | 805.44  |
| Cellulose                             | 58.26         | -       | 58.26         | -       | 58.26         | -       | 58.26         | -       |
| Soybean oil                           | 29.13         | 262.17  | 29.13         | 262.17  | 29.13         | 262.17  | 29.13         | 262.17  |
| Lard                                  | 206.84        | 1861.56 | -             | -       | -             | -       | -             | -       |
| Caprylic triglyceride                 |               |         | 206.84        | 1861.56 | -             | -       | -             | -       |
| Capric triglyceride                   |               |         | -             | -       | 206.84        | 1861.56 | -             | -       |
| Lauric triglyceride                   |               |         | -             | -       | -             | -       | 206.84        | 1861.56 |
| Mineral mix                           | 11.65         | -       | 11.65         | -       | 11.65         | -       | 11.65         | -       |
| Dicalcium phosphate                   | 15.15         | -       | 15.15         | -       | 15.15         | -       | 15.15         | -       |
| Calcium carbonate                     | 6.41          | -       | 6.41          | -       | 6.41          | -       | 6.41          | -       |
| Potassium citrate, 1 H <sub>2</sub> O | 19.23         | -       | 19.23         | -       | 19.23         | -       | 19.23         | -       |
| Vitamin mix                           | 11.56         | 46.24   | 11.56         | 46.24   | 11.56         | 46.24   | 11.56         | 46.24   |
| Choline bitartrate                    | 2.33          | -       | 2.33          | -       | 2.33          | -       | 2.33          | -       |
| FD&C Red Dye #40                      | 0.058         | -       | 0.058         | -       | 0.058         | -       | 0.058         | -       |
| Total                                 | 1000          | 4727.09 | 1000          | 4727.09 | 1000          | 4727.09 | 1000          | 4727.09 |

**Table S2.** Composition and Energy Contents of Diets.

| Product                               | Normal diet (AIN-93M) |       | High fat diet (D12451) |         | Custom feed |         |
|---------------------------------------|-----------------------|-------|------------------------|---------|-------------|---------|
|                                       | gm%                   | Kcal% | gm%                    | Kcal%   | gm%         | Kcal%   |
| Protein                               | 14.2                  | 14.7  | 24                     | 20      | 24          | 20      |
| Carbohydrate                          | 73.1                  | 75.9  | 41                     | 35      | 41          | 35      |
| Fat                                   | 4                     | 9.4   | 24                     | 45      | 24          | 45      |
| Ingredients                           | Gm                    | Kcal  | Gm                     | Kcal    | Gm          | Kcal    |
| Casein                                | 140                   | 560   | 233.06                 | 932.24  | 233.06      | 932.24  |
| L-Cystine                             | 1.8                   | 7.2   | 3.50                   | 14      | 3.50        | 14      |
| Corn starch                           | 495.692               | 1983  | 84.83                  | 339.32  | 84.83       | 339.32  |
| Maltodextrin 10                       | 125                   | 500   | 116.53                 | 466.12  | 116.53      | 466.12  |
| Sucrose                               | 100                   | 400   | 201.36                 | 805.44  | 201.36      | 805.44  |
| Cellulose                             | 50                    | -     | 58.26                  | -       | 58.26       | -       |
| Soybean oil                           | 40                    | 360   | 29.13                  | 262.17  | 29.13       | 262.17  |
| Lard                                  | -                     | -     | 206.84                 | 1861.56 | -           | -       |
| Lauric triglyceride                   |                       |       |                        |         | 206.84      | 1861.56 |
| Mineral mix                           | 35                    | -     | 11.65                  | -       | 11.65       | -       |
| Dicalcium phosphate                   | -                     | -     | 15.15                  | -       | 15.15       | -       |
| Calcium carbonate                     | -                     | -     | 6.41                   | -       | 6.41        | -       |
| Potassium citrate, 1 H <sub>2</sub> O | -                     | -     | 19.23                  | -       | 19.23       | -       |
| Vitamin mix                           | 10                    | 40    | 11.56                  | 46.24   | 11.56       | 46.24   |
| Choline bitartrate                    | 2.5                   | -     | 2.33                   | -       | 2.33        | -       |
| FD&C Red Dye #40                      | -                     |       | 0.058                  | -       | 0.058       | -       |
| Total                                 | 1000                  | 3850  | 1000                   | 4727.09 | 1000        | 4727.09 |

**Table S3** Primary Antibody Information

| Antibodies                                          | Details                                    | Dilution |
|-----------------------------------------------------|--------------------------------------------|----------|
| IRS1                                                | Affinity, Rabbit Polyclonal, AF6273        | 1:1000   |
| Phospho-IRS1<br>(Ser307)                            | Affinity, Rabbit Polyclonal, AF3272        | 1:1000   |
| Phospho-PI3Kp85<br>(Tyr458)[Tyr467]/p55<br>(Tyr199) | Affinity, Rabbit Polyclonal, AF3242        | 1:1000   |
| PI3K p85/p55                                        | Affinity, Rabbit Polyclonal, AF6242        | 1:1000   |
| Phospho-AKT1/2/3<br>(Ser473)                        | Affinity, Rabbit Polyclonal, AF0016        | 1:500    |
| pan-AKT1/2/3                                        | Affinity, Rabbit Polyclonal, 26513-1-AP    | 1:800    |
| GSK3 beta                                           | Affinity, Rabbit Polyclonal, AF5016        | 1:1000   |
| Phospho-GSK3 beta<br>(Ser9)                         | Affinity, Rabbit Polyclonal, AF2016        | 1:1000   |
| AMPK alpha                                          | Affinity, Rabbit Polyclonal, AF6423        | 1:800    |
| Phospho-AMPK<br>alpha (Thr172)                      | Affinity, Rabbit Polyclonal, AF3423        | 1:1000   |
| PEPCK                                               | Proteintech, Rabbit Polyclonal, 14892-1-AP | 1:1000   |
| G6PC                                                | Proteintech, Rabbit Polyclonal, 22169-1-AP | 1:1000   |
| GLUT4                                               | Proteintech, Mouse Monoclonal, 66846-1-Ig  | 1:1000   |
| CDK5                                                | Affinity, Mouse monoclonal, BF0121         | 1:10000  |
| Phospho-CDK5<br>(Ser159)                            | Affinity, Rabbit Polyclonal, AF8366        | 1:1000   |
| PPAR Gamma                                          | Bioss, Rabbit Polyclonal, bs-4590R         | 1:1000   |
| Phospho-PPAR<br>Gamma (ser273)                      | Bioss, Rabbit Polyclonal, bs-4888R         | 1:1000   |
| $\beta$ -actin                                      | Proteintech, Mouse Monoclonal, 66009-1-Ig  | 1:10000  |
| Goat anti- mouse                                    | Proteintech, HRP conjugate, SA00001-1      | 1:5000   |
| Goat Anti-Rabbit                                    | Proteintech, HRP conjugate, SA00001-2      | 1:5000   |
